# Supplementary material for: Luminescent properties of europium titanium phosphate thin films deposited by atomic layer deposition
Source: Royal Society of Chemistry journal article supplement (doi:10.1039/c6ra27644j), 2017-01-01
Supplement: c6ra27644j1.pdf [file c6ra27644j1.pdf]

## Supplementary

**Table S1:** Overview of number of MP-cycles, thickness (from ellipsometry), deposition rate, relative concentrations of each cation (from XRF), and surface roughness,  $R_q$  (from AFM for the as deposited thin films). NM means that no measurement data is available for that sample.

| Pulse % EPO (%) | MP - cycles | Thickness (nm) | Deposition rate (Å/MP-cycle) | Eu % (cation %) | Ti % (cation %) | P % (cation %) | $R_q$ (nm) |
|-----------------|-------------|----------------|------------------------------|-----------------|-----------------|----------------|------------|
| 0               | 1000        | 82             | 0.82                         | 0               | 46.0            | 54.0           | NM         |
| 1               | 1400        | 113            | 0.81                         | NM              | NM              | NM             | NM         |
| 5               | 1160        | 92             | 0.79                         | 2.1             | 44.2            | 53.7           | 0.35       |
| 10              | 1150        | 97             | 0.84                         | 3.0             | 41.7            | 55.3           | 0.30       |
| 20              | 1125        | 93             | 0.83                         | 5.9             | 38.7            | 55.5           | 0.35       |
| 30              | 1220        | 104            | 0.86                         | 8.8             | 34.3            | 56.9           | 0.31       |
| 40              | 1100        | 95             | 0.86                         | 11.3            | 30.8            | 57.9           | 0.30       |
| 50              | 1080        | 100            | 0.92                         | 13.9            | 27.0            | 59.1           | 0.37       |
| 60              | 1065        | 89             | 0.84                         | 18.7            | 22.3            | 59.0           | 0.24       |
| 70              | 1100        | 97             | 0.88                         | 23.7            | 17.4            | 58.9           | 0.25       |
| 80              | 1125        | 96             | 0.86                         | 27.3            | 11.8            | 60.9           | 0.35       |
| 90              | 1060        | 97             | 0.92                         | 32.4            | 6.5             | 61.1           | 0.33       |
| 100             | 1000        | 101            | 1.01                         | 37.9            | 0               | 62.1           | NM         |

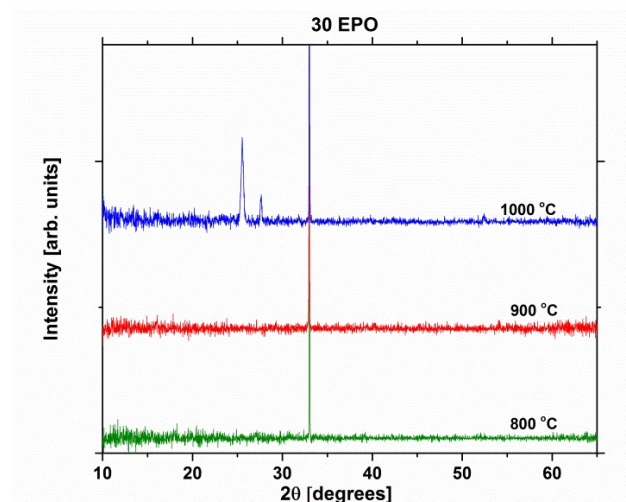

**Figure S1:** XRD 30 EPO 800-1000 °C. No crystalline phase could be detected after annealing below 900 °C.

**Table S2: Surface Roughness,  $R_q$ , in nm from AFM scans shown in Figure S2 and Figure S3.**

| Annealing Temperature (°C) | 20 EPO | 30 EPO | 70 EPO | 80 EPO |
|----------------------------|--------|--------|--------|--------|
| 600                        | 0.3    | 0.2    | -      | -      |
| 700                        | 2.0    | 2.9    | 0.1    | 0.1    |
| 800                        | 11.3   | 2.0    | 1.0    | 1.1    |
| 1000                       | 11.3   | 9.8    | 7.4    | 6.1    |

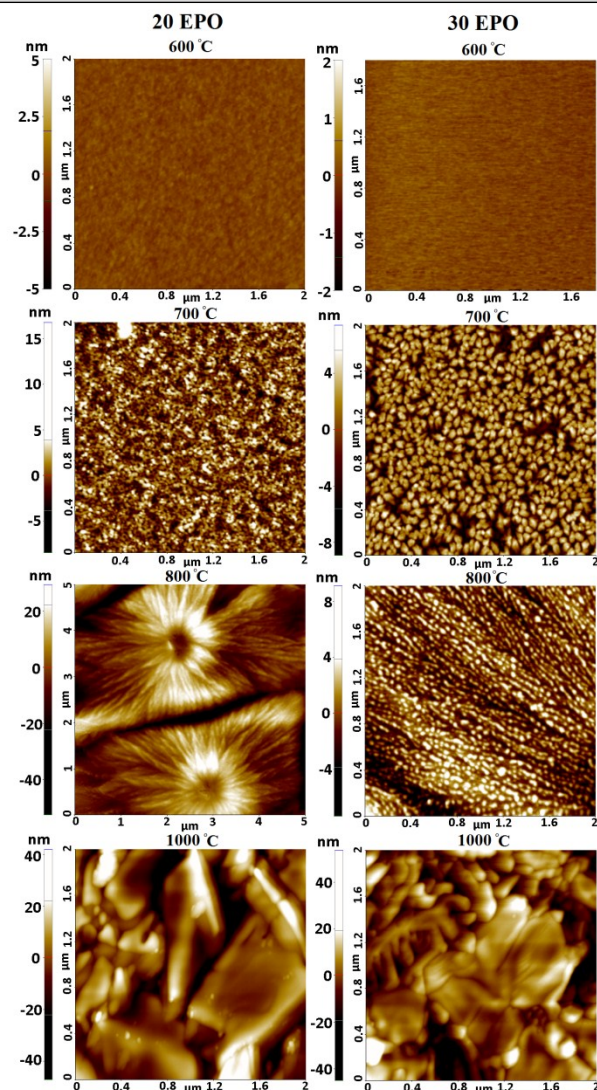

**Figure S2:** AFM images of samples with 20 EPO (left column) and 30 EPO (right column), annealed at 600, 700, 800 and 1000 °C. 20 and 30 EPO samples annealed at 600 °C or below did not exhibit any features. 20 EPO at 800 °C shows a larger scan area in order to better display the morphology of the sample. Note the difference in the z-scale.

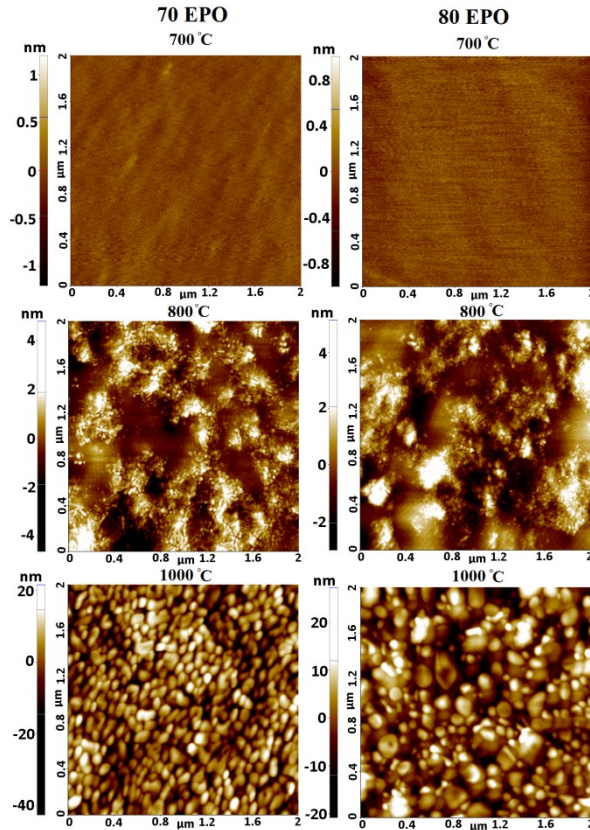

**Figure S3:** AFM images of samples with 70 EPO (left column) and 80 EPO (right column), annealed at 700, 800 and 1000 °C. 70 and 80 EPO samples annealed at 700 °C or below did not exhibit any features. Note the difference in the z-scale.

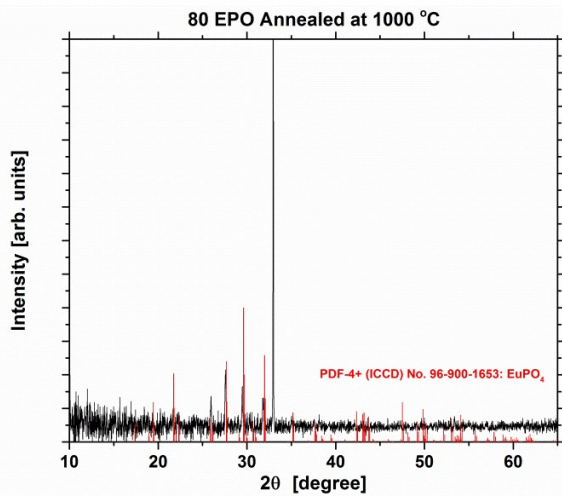

**Figure S4:** XRD of 80 EPO compared with EuPO<sub>4</sub> crystal data.

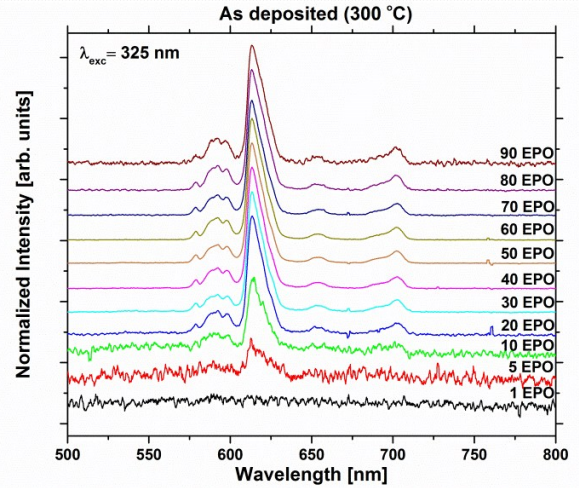

**Figure S5:** Normalized PL emission spectra of as deposited samples with increasing pulse % EPO from bottom to top. 1-10 EPO are quenched due to photobleaching.

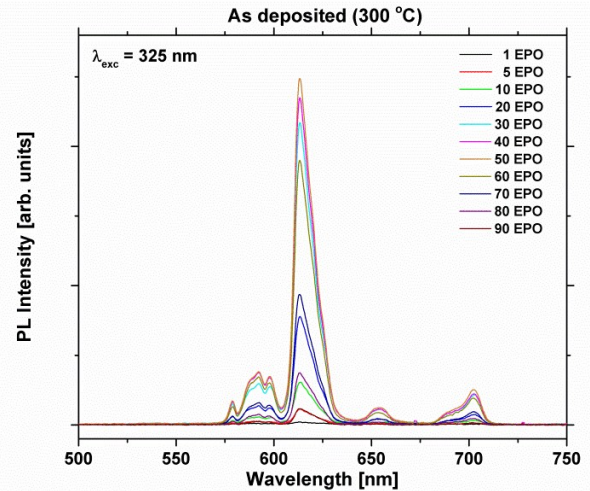

**Figure S6:** PL of as deposited samples after 20 s of laser exposure. Shape of emission is identical for all compositions.

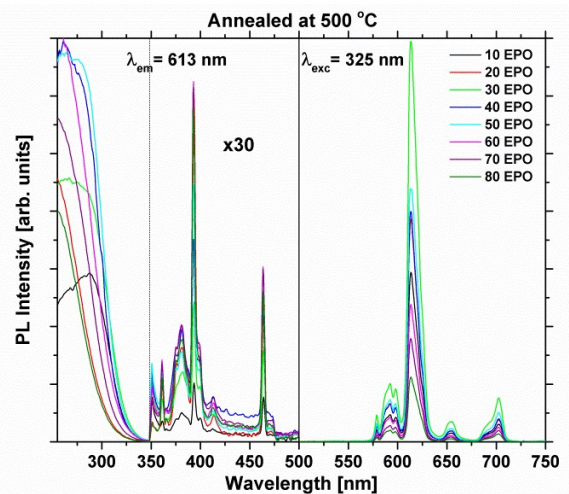



**Figure S7:** Excitation measurements of 10-80 pulse % EPO of samples annealed at 500 °C, monitoring the Eu<sup>3+</sup> emission at 613 nm (left). PL emission from 325 nm laser (right). PLE and PL were not measured with the same equipment.

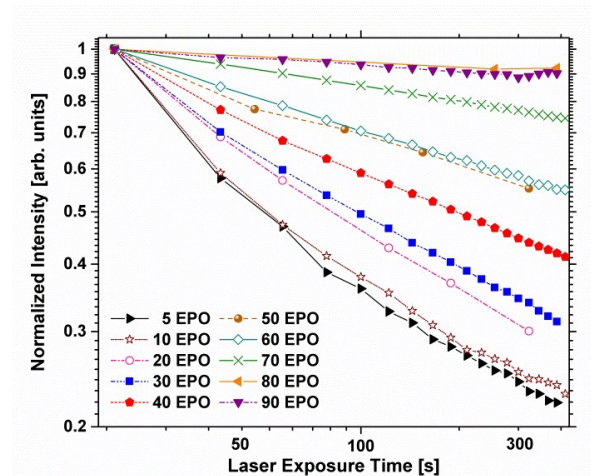

**Figure S8:** Normalized PL intensity vs. laser exposure time for as deposited samples plotted on logarithmic scales.

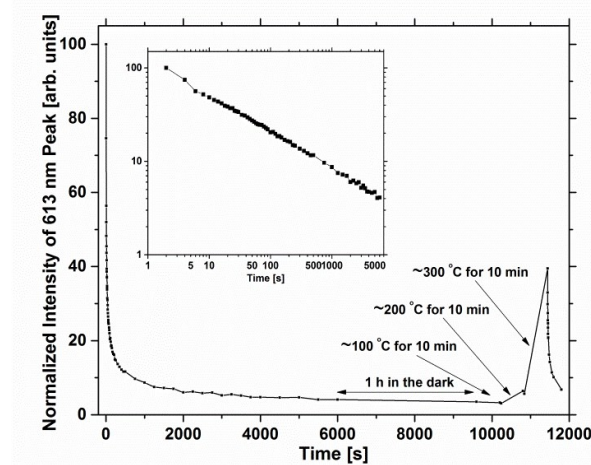

**Figure S9:** Normalized luminescence intensity of the Eu<sup>3+</sup> emission at 613 nm for an as deposited sample containing 20 EPO vs. laser exposure time. After 6000 s the sample was left in the dark for 1 h before being heated on a hot plate for 10 min at 100, 200 and 300 °C. The luminescence was completely recovered after tempering in a furnace at 300°C for 1 h. Inset shows the first 6000 s of the experiment on logarithmic scales.

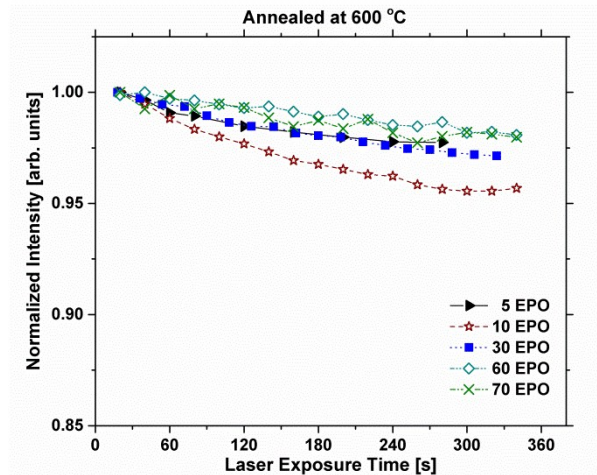

**Figure S10:** Normalized PL intensity vs. laser exposure time for selected samples annealed at 600 °C, plotted on a linear scale.

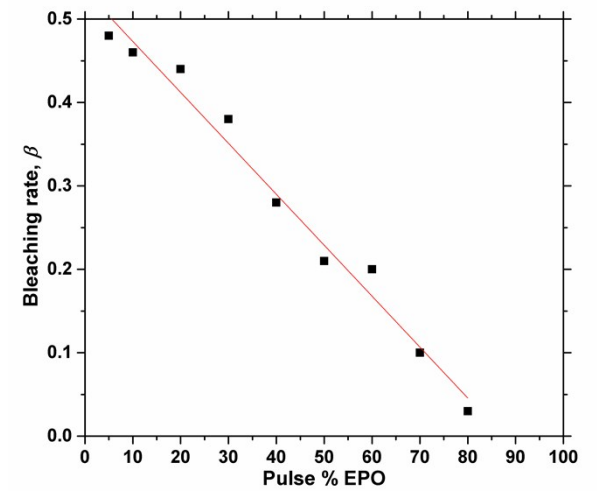

**Figure S11:** Bleaching rate for as deposited samples exposed to 325 nm excitation, fitted to a linear curve. 1 and 90 EPO were omitted due to low signal to noise ratio for these samples.

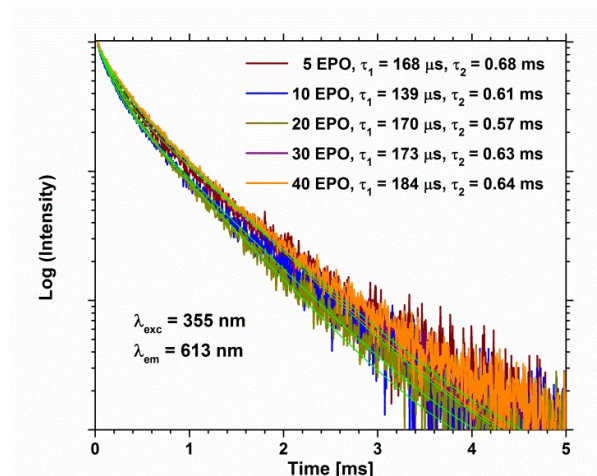

**Figure S12:** PL decay measurements of as deposited samples with 5-40 EPO, fitted by a biexponential decay function.

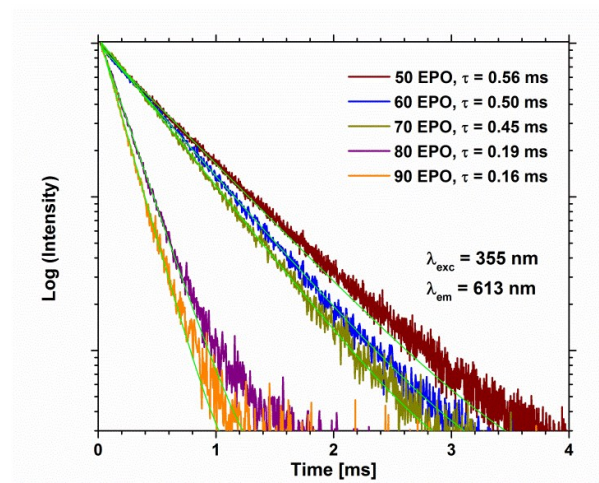

**Figure S13:** PL decay measurements of as deposited samples with 50-90 EPO, fitted by a single exponential decay function.

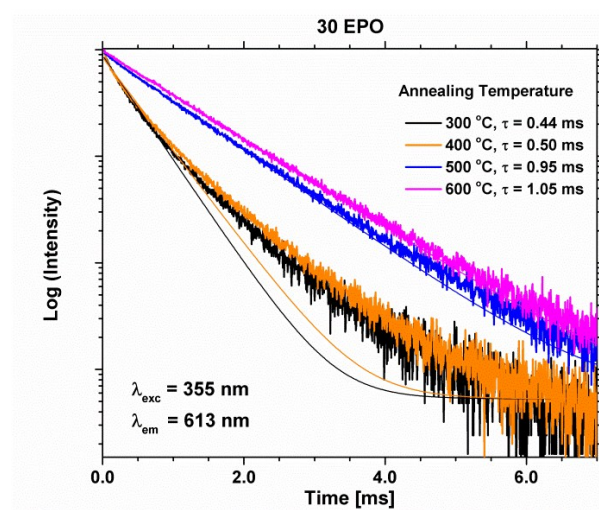

**Figure S14:** PL decay measurements of samples with 30 EPO and annealed at 300-600 °C.  $\tau$  is extracted from fitting the data to a single exponential decay function.

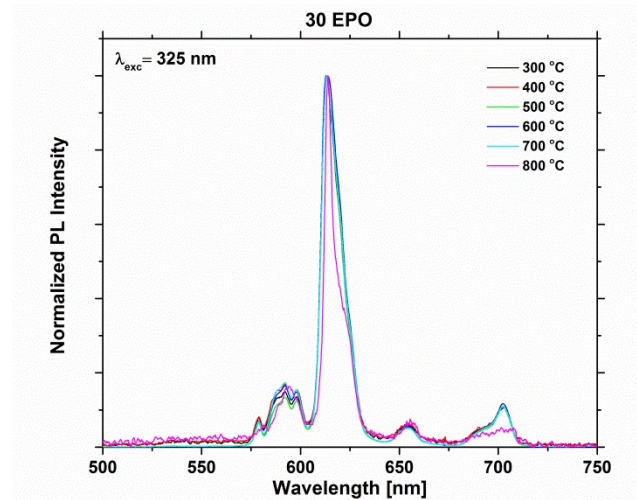

**Figure S15:** Normalized PL of samples containing 30 EPO and annealed at 300-800 °C. The shape of the spectrum remains unchanged up to 800 °C.

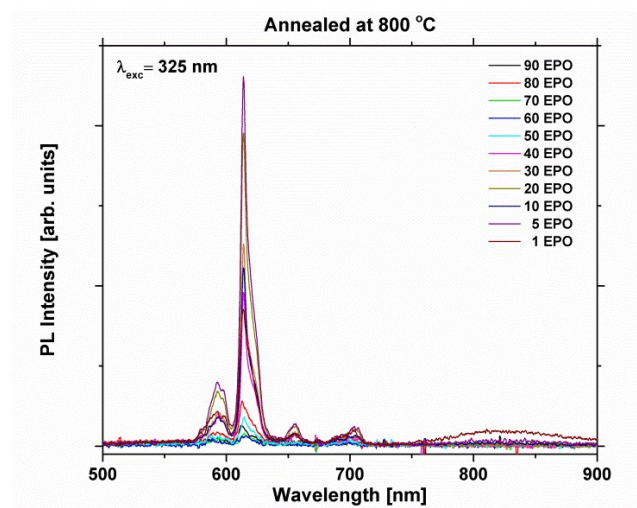

**Figure S16:** PL of samples annealed at 800 °C.

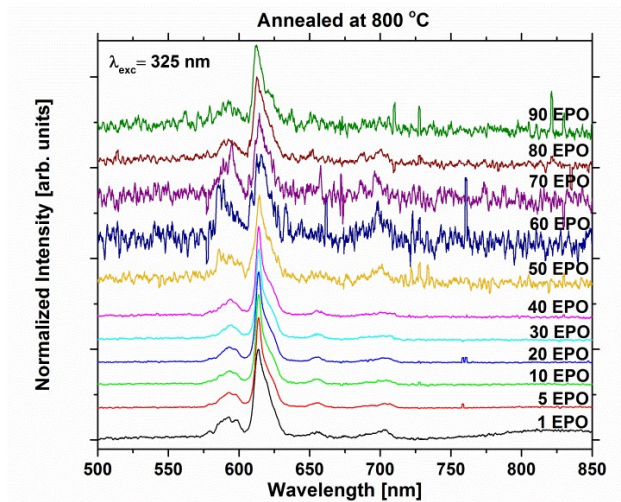

Figure S17: Normalized PL scans of samples annealed at 800 °C.

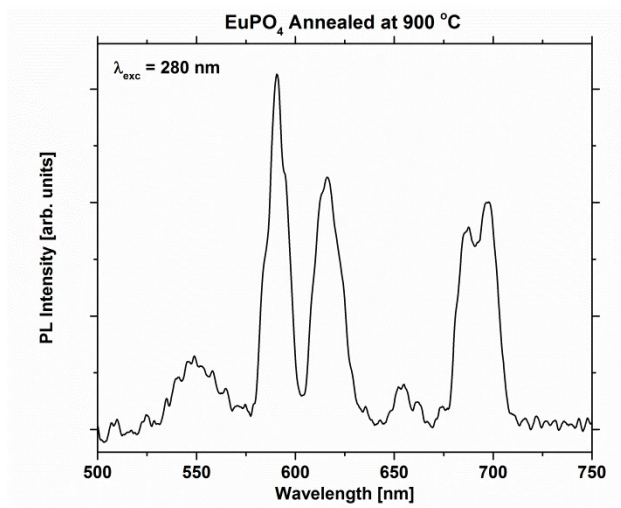

Figure S18: PL emission of 100 EPO annealed at 900 °C.
